# Supplementary material for: Self-assembled amphiphilic mixed α/β-tetrapeptoid nanostructures as promising drug delivery vehicles
Source: Royal Society of Chemistry journal article supplement (doi:10.1039/c6nj03281h), 2017-01-01
Supplement: c6nj03281h1.pdf [file c6nj03281h1.pdf]

## Supporting information

### **Self-assembled amphiphilic mixed $\alpha/\beta$ -tetrapeptoid nanostructures as promising drug delivery vehicles**

Rahul Goel<sup>1</sup>, Ashwani Kumar Sharma<sup>\*2</sup> and Alka Gupta<sup>\*1</sup>

\*Corresponding authors

<sup>1</sup>Department of Chemistry, Dyal Singh College, University of Delhi, Lodhi Road, New Delhi-110003, India. E-mail: [alkagupta@dsc.du.ac.in](mailto:alkagupta@dsc.du.ac.in)

<sup>2</sup>NAR Laboratory, CSIR-Institute of Genomics and Integrative Biology, Delhi University Campus, Mall Road, Delhi-110007, India. E-mail: [ashwani@igib.res.in](mailto:ashwani@igib.res.in)

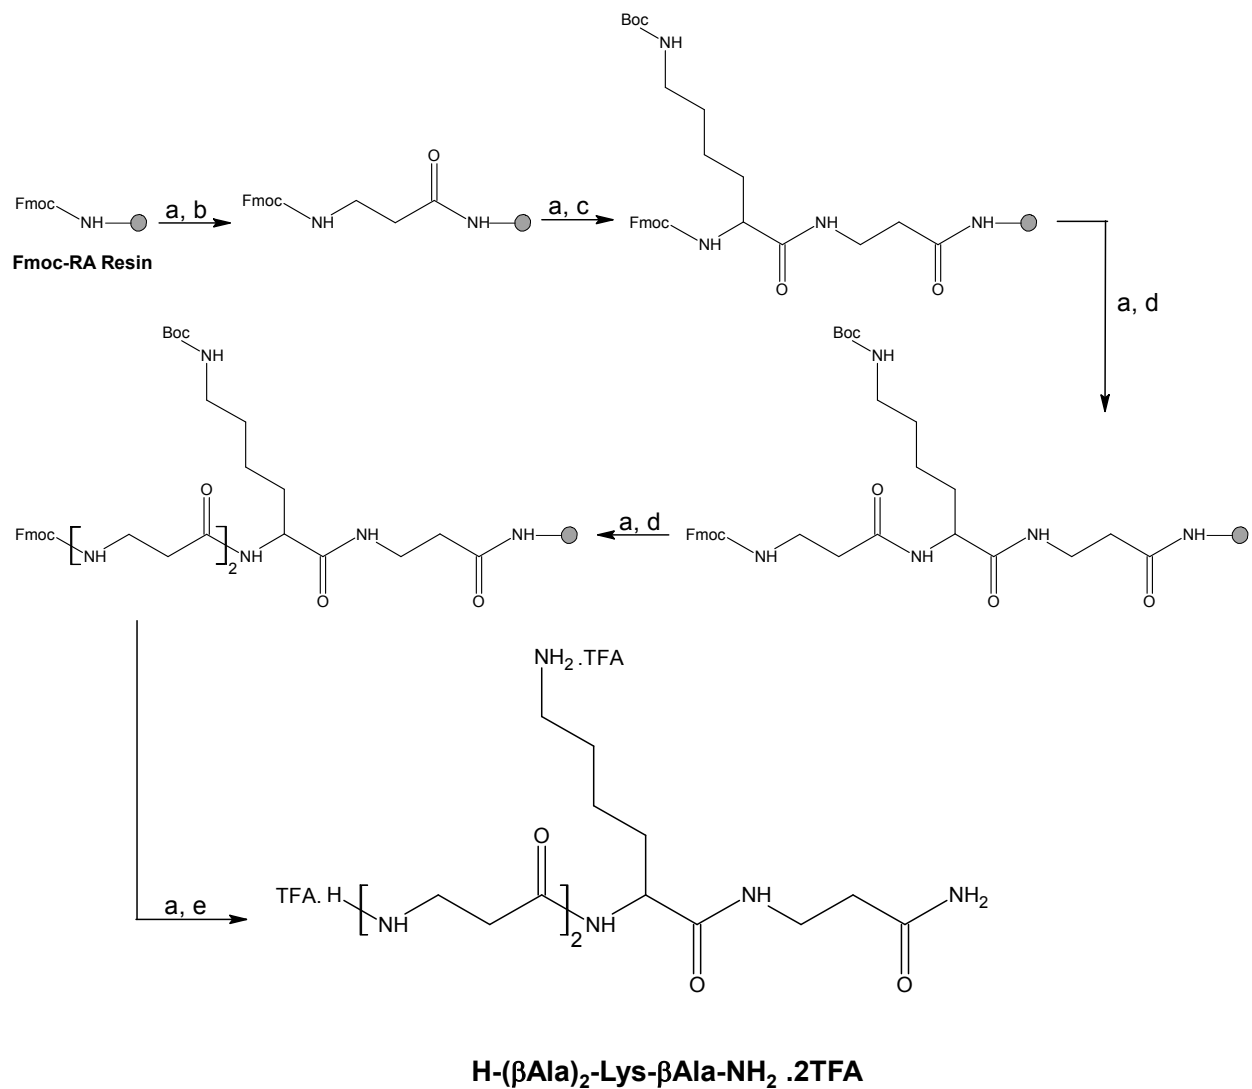

Fig. S1 Solid phase synthesis of tetrapeptoid, H-βAla-βAla-Lys-βAla-NH<sub>2</sub> .2TFA. Reagents and conditions: (a) 30% piperidine-DMF, 2 × 10 min; (b) Fmoc-βAlanine-OH (4 equiv), HOBt (4 equiv), HBTU (4 equiv), DIPEA (8 equiv), DMF, 3h; (c) Fmoc-Lysine(Boc)-OH (3 equiv), HBTU (3 equiv), DIPEA (6 equiv), DMF, 2h; (d) Fmoc-βAlanine-OH (3 equiv), HBTU (3 equiv), DIPEA (6 equiv), DMF, 2h; (e) TFA: thioanisole: water: phenol: ethanedithiol, 82.5: 5: 5: 5: 2.5 (v/v), 3h.

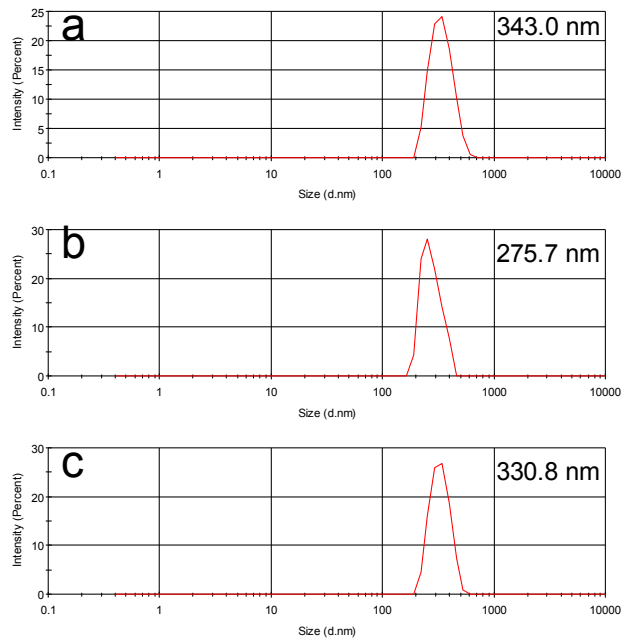

Fig. S2 DLS size distribution graph of tetrapeptoid nanoassemblies (a) unloaded assemblies, (b) assemblies loaded with aspirin and (c) assemblies loaded with L-Dopa.

Table S1. DLS dilution studies on tetrapeptoid nanoassemblies

| S. No. | Sample                                   | Size (nm) $\pm$ SD | PDI $\pm$ SD      |
|--------|------------------------------------------|--------------------|-------------------|
| 1      | Tetrapeptoid nanoassemblies (1.0 mg/ml)  | 343.0 $\pm$ 28.89  | 0.307 $\pm$ 0.054 |
| 2      | Tetrapeptoid nanoassemblies (0.50 mg/ml) | 342.8 $\pm$ 31.80  | 0.250 $\pm$ 0.085 |
| 3      | Tetrapeptoid nanoassemblies (0.33 mg/ml) | 317.7 $\pm$ 41.46  | 0.269 $\pm$ 0.048 |
| 4      | Tetrapeptoid nanoassemblies (0.25 mg/ml) | 334.8 $\pm$ 42.28  | 0.352 $\pm$ 0.016 |

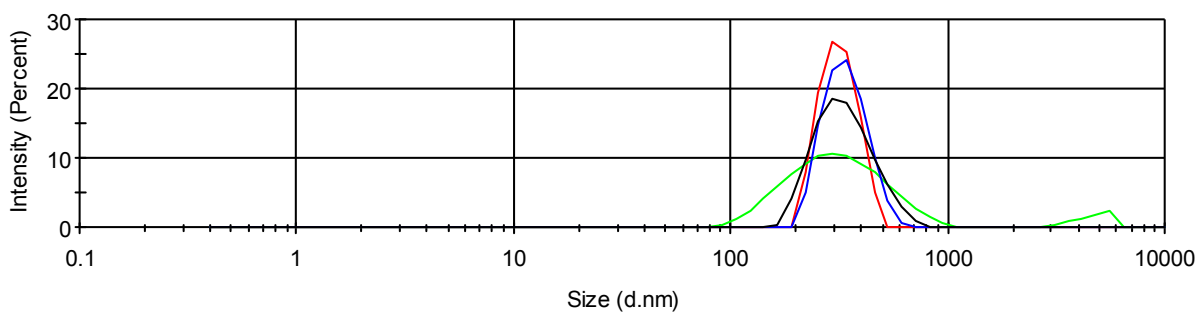

Fig. S3 DLS size distribution graph depicting stability of tetrapeptoid nanoassemblies on dilution from 1 mg/ml to 0.25 mg/ml (blue, 1 mg/ml; black, 0.5 mg/ml; red, 0.33 mg/ml; green, 0.25 mg/ml).

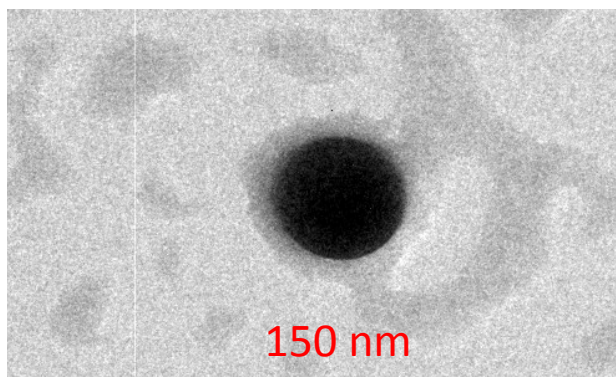

Fig. S4 TEM micrograph of tetrapeptoid nanostructure depicting stability in the dilute condition, 0.25 mg/ml (scale bar 100 nm).
